# Supplementary material
Source: PubMed Central journal article supplement (PMC4205664)
Supplement: pnas.1400374111.sapp.pdf [file pnas.1400374111.sapp.pdf]

# Network histograms and universality of blockmodel approximation

Sofia C. Olhede and Patrick J. Wolfe

Supporting Information

## A Auxiliary results for the proof of Theorem 1

Throughout we assume that  $f$  is a symmetric function on  $(0, 1)^2$  that is also  $\alpha$ -Hölder continuous for some  $0 < \alpha \leq 1$ , with  $f \in \text{Hölder}^\alpha(M)$  meaning that

$$\sup_{(x,y) \neq (x',y') \in (0,1)^2} \frac{|f(x,y) - f(x',y')|}{|(x,y) - (x',y')|^\alpha} \leq M < \infty,$$

where  $|\cdot|$  is the Euclidean metric on  $\mathbb{R}^2$ .

We also define a set of summation indices  $R_{ab}$ , which is the range of values of  $i < j$  over which one must aggregate  $A_{ij}$  to retrieve  $\bar{A}_{ab}^*$ . We write

$$h_a := h \mathbb{I}(a < k) + (h+r) \mathbb{I}(a = k);$$

$$h_{ab}^2 := |R_{ab}| = \begin{cases} h^2 & \text{if } 1 \leq a < b < k, \\ \binom{h}{2} & \text{if } 1 \leq a = b < k, \\ h \cdot (h+r) & \text{if } 1 \leq a < b = k, \\ \binom{h+r}{2} & \text{if } a = b = k. \end{cases}$$

**Proposition 1** (Moments of  $\bar{A}_{ab}^*$ ). *Let  $f \in \text{Hölder}^\alpha(M)$  be symmetric on  $(0, 1)^2$ , and let the labeling  $\tilde{z}_i$  be determined from the latent vector  $\xi$  by*

$$\tilde{z}_i = \min\left\{\lceil (i)^{-1}/h \rceil, k\right\},$$

where  $(i)^{-1}$  is the rank of  $\xi_i$  from smallest to largest. Thus  $(i)$  is defined as the index chosen so that  $\xi_{(1)} \leq \xi_{(2)} \leq \dots \leq \xi_{(n)}$ , and  $(i)^{-1}$  is its inverse function.

Assign  $i_n = i/(n+1)$  for  $i = 1, \dots, n$ , and define the oracle estimator of  $f(x, y)$  based on knowledge of  $\xi$  in terms of the quantities

$$\bar{A}_{ab}^* = \frac{\sum_{i < j} A_{ij} \mathbb{I}(\tilde{z}_i = a) \mathbb{I}(\tilde{z}_j = b)}{\sum_{i < j} \mathbb{I}(\tilde{z}_i = a) \mathbb{I}(\tilde{z}_j = b)}, \quad 1 \leq a, b \leq k.$$

With these definitions, the means and variances of each oracle estimator component  $\bar{A}_{ab}^*$  satisfy the following:

$$\begin{aligned} |\mathbb{E} \bar{A}_{ab}^* - \rho_n \bar{f}_{ab}| &\leq \rho_n M (2n)^{-\alpha/2} \{1 + o(1)\}, \\ \left| \text{Var} \bar{A}_{ab}^* - \frac{\rho_n \bar{f}_{ab} - \rho_n^2 \bar{f}_{ab}^2}{h_{ab}^2} \right| &\leq \rho_n \frac{M}{h_{ab}^2 (2n)^{\alpha/2}} \{1 + o(1)\} + \rho_n^2 M^2 (2n)^{-\alpha}; \end{aligned}$$

where  $\bar{f}_{ab}$  and  $\bar{f}_{ab}^2$  are defined by

$$\bar{f}_{ab} = \frac{1}{|\omega_{ab}|} \iint_{\omega_{ab}} f(x, y) dx dy, \quad \bar{f}_{ab}^2 = \frac{1}{|\omega_{ab}|} \iint_{\omega_{ab}} f^2(x, y) dx dy;$$

and the region  $\omega_{ab}$  is given by

$$\omega_{ab} = \begin{cases} [(a-1)h/n, ah/n] \times [(b-1)h/n, bh/n] & \text{if } a < k \text{ and } b < k, \\ [(k-1)h/n, 1] \times [(b-1)h/n, bh/n] & \text{if } a = k \text{ and } b < k, \\ [(b-1)h/n, bh/n] \times [(k-1)h/n, 1] & \text{if } a < k \text{ and } b = k, \\ [(k-1)h/n, 1] \times [(k-1)h/n, 1] & \text{if } a = k \text{ and } b = k. \end{cases} \quad (1)$$

*Proof.* Note that the oracle sample proportion estimator takes the form

$$\begin{aligned} \bar{A}_{ab}^* &= \frac{\sum_{i < j} A_{ij} \mathbb{I}(\tilde{z}_i = a) \mathbb{I}(\tilde{z}_j = b)}{\sum_{i < j} \mathbb{I}(\tilde{z}_i = a) \mathbb{I}(\tilde{z}_j = b)} \\ &= \begin{cases} \frac{\sum_{j=h(b-1)+1}^{hb} \sum_{i=h(a-1)+1}^{ha \mathbb{I}(a \neq b) + (j-1) \mathbb{I}(a=b)} A_{(i)(j)}}{h_{ab}^2} & \text{if } a < k \text{ and } b < k, \\ \frac{\sum_{j=h(k-1)+1}^n \sum_{i=h(a-1)+1}^{ha \mathbb{I}(a \neq b) + (j-1) \mathbb{I}(a=b)} A_{(i)(j)}}{h_{ak}^2} & \text{if } a \leq k \text{ and } b = k, \\ \bar{A}_{bk}^* & \text{if } a = k \text{ and } b \leq k; \end{cases} \\ &= \frac{\sum_{(i,j) \in R_{ab}} A_{(i)(j)}}{h_{ab}^2}, \end{aligned}$$

where  $R_{ab}$  is defined implicitly to make the summation valid, and is non-random. Thus we may conclude that

$$\mathbb{E} \bar{A}_{ab}^* = \frac{1}{h_{ab}^2} \sum_{(i,j) \in R_{ab}} \mathbb{E} A_{(i)(j)}. \quad (2)$$

We define  $\tilde{f}_{ab}$ , for  $i_n = i/(n+1)$  and  $j_n = j/(n+1)$ , as

$$\tilde{f}_{ab} = \frac{1}{h_{ab}^2} \sum_{(i,j) \in R_{ab}} f(i_n, j_n). \quad (3)$$

We then use (6) from Lemma 2 to obtain that

$$\left| \mathbb{E} \bar{A}_{ab}^* - \rho_n \tilde{f}_{ab} \right| \leq \rho_n M \{2(n+2)\}^{-\alpha/2}. \quad (4)$$

We note from Lemma 4 that as  $f \in \text{H\"older}^\alpha(M)$  on  $(0, 1)^2$ ,

$$|\tilde{f}_{ab} - \bar{f}_{ab}| < M 2^{\alpha/2} n^{-\alpha} \{1 + 2^\alpha \mathbb{I}(a = b)\}. \quad (5)$$

We then apply the triangle inequality to (2)–(5) to derive

$$\begin{aligned} |\mathbb{E} \bar{A}_{ab}^* - \rho_n \bar{f}_{ab}| &\leq \rho_n M \left[ \{2(n+2)\}^{-\alpha/2} + 2^{\alpha/2} n^{-\alpha} \{1 + 2^\alpha \mathbb{I}(a = b)\} \right] \\ &\leq \rho_n M (2n)^{-\alpha/2} \{1 + o(1)\}. \end{aligned}$$

This establishes the form of  $\mathbb{E} \bar{A}_{ab}^*$ . We next calculate

$$\text{Var} \bar{A}_{ab}^* = \frac{\sum_{(i,j) \in R_{ab}} \sum_{(m,l) \in R_{ab}} \text{Cov}\{A_{(i)(j)}, A_{(m)(l)}\}}{h_{ab}^4}.$$

Referring to (7) of Lemma 2,

$$\begin{aligned} \text{Var} \bar{A}_{ab}^* &= \frac{1}{h_{ab}^4} \sum_{(i,j) \in R_{ab}} \sum_{(m,l) \in R_{ab}} \text{Cov}\{A_{(i)(j)}, A_{(m)(l)}\} \\ &\leq \frac{1}{h_{ab}^4} \sum_{(i,j) \in R_{ab}} \rho_n f(i_n, j_n) \{1 - \rho_n f(i_n, j_n)\} + \rho_n^2 M^2 [2(n+2)]^{-\alpha} \\ &\quad + \frac{\rho_n}{h_{ab}^2} M \{2(n+2)\}^{-\alpha/2} \left[1 + \rho_n M \{2(n+2)\}^{-\alpha/2}\right]. \end{aligned}$$

We may likewise determine the lower bound of

$$\begin{aligned} \text{Var} \bar{A}_{ab}^* &\geq \frac{1}{h_{ab}^4} \sum_{(i,j) \in R_{ab}} \rho_n f(i_n, j_n) \{1 - \rho_n f(i_n, j_n)\} - \rho_n^2 M^2 [2(n+2)]^{-\alpha} \\ &\quad - \frac{\rho_n}{h_{ab}^2} M \{2(n+2)\}^{-\alpha/2} \left[1 + \rho_n M \{2(n+2)\}^{-\alpha/2}\right]. \end{aligned}$$

From Lemmas 4 and 5 below, writing  $\bar{f}_{ab}^2$  for the normalized integral of  $f^2(x, y)$  over the block  $\omega_{ab}$ , we have respectively that

$$\left| \tilde{f}_{ab} - \bar{f}_{ab} \right| \leq \frac{M 2^{\alpha/2}}{n^\alpha} \{1 + 2^\alpha \mathbb{I}(a = b)\}$$

and

$$\left| \frac{1}{h_{ab}^2} \sum_{(i,j) \in R_{ab}} f^2(i_n, j_n) - \bar{f}_{ab}^2 \right| \leq \frac{2 \|f\|_\infty M 2^{\alpha/2}}{n^\alpha} \{1 + 2^\alpha \mathbb{I}(a = b)\}.$$

Together these results yield the claimed expression for the variance of  $\bar{A}_{ab}^*$ .  $\square$

**Lemma 1.** *Let  $f \in \text{H\"older}^\alpha(M)$ , with  $\bar{f}_{ab} = |\omega_{ab}|^{-1} \iint_{\omega_{ab}} f(x, y) dx dy$  defined as its local average over  $\omega_{ab}$ . Then*

$$\frac{1}{|\omega_{ab}|} \iint_{\omega_{ab}} |f(x, y) - \bar{f}_{ab}|^2 dx dy \leq M^2 2^\alpha (h/n)^{2\alpha} \{1 + 2^{2\alpha} \mathbb{I}(a = k \text{ or } b = k)\}.$$

*Proof.* Recall that  $\omega_{ab}$  is given by (1), as before. Note from the definition of the set Hölder $^\alpha(M)$  that if  $(x, y) \in \omega_{ab}$  and  $a, b < k$ , then

$$\begin{aligned} |\bar{f}_{ab} - f(x, y)| &= \left| \frac{1}{|\omega_{ab}|} \iint_{\omega_{ab}} f(x', y') dx' dy' - f(x, y) \right| \\ \Rightarrow |\bar{f}_{ab} - f(x, y)| &\leq \frac{1}{|\omega_{ab}|} \iint_{\omega_{ab}} |f(x', y') - f(x, y)| dx' dy' \\ &\leq \frac{1}{|\omega_{ab}|} \iint_{\omega_{ab}} M|(x', y') - (x, y)|^\alpha dx' dy' \\ &\leq \frac{1}{|\omega_{ab}|} \iint_{\omega_{ab}} M[2(h/n)^2]^{\alpha/2} dx' dy' = M2^{\alpha/2}(h/n)^\alpha. \end{aligned}$$

Thus

$$\begin{aligned} |\bar{f}_{ab} - f(x, y)|^2 &\leq M^2 2^\alpha (h/n)^{2\alpha} \\ \Rightarrow \frac{1}{|\omega_{ab}|} \iint_{\omega_{ab}} |f(x, y) - \bar{f}_{ab}|^2 dx dy &\leq M^2 2^\alpha (h/n)^{2\alpha}. \end{aligned}$$

If  $a = k$  or  $b = k$  then we replace  $h$  by  $2h$  to obtain a bound.  $\square$

Lemma 1 has been adapted from Wolfe and Olhede [16].

**Lemma 2** (Moments of  $A_{(i)(j)}$ ). *Let  $i_n = i/(n+1)$  for  $i = 1, \dots, n$ , and let  $(i)$  be defined as the index chosen so that  $\xi_{(1)} \leq \xi_{(2)} \leq \dots \leq \xi_{(n)}$ . Then the means and variances of each  $A_{(i)(j)}$  for  $i < j$  satisfy the following:*

$$|\mathbb{E} A_{(i)(j)} - \rho_n f(i_n, j_n)| \leq \rho_n M \{2(n+2)\}^{-\alpha/2}, \quad (6)$$

$$\begin{aligned} |\text{Var} A_{(i)(j)} - \rho_n f(i_n, j_n)(1 - \rho_n f(i_n, j_n))| &\leq \rho_n \cdot M \{2(n+2)\}^{-\alpha/2} \\ &\cdot [1 + \rho_n M \{2(n+2)\}^{-\alpha/2}]. \end{aligned} \quad (7)$$

$$\text{For } i \neq m \text{ or } j \neq l, \quad \text{Cov}\{A_{(i)(j)}, A_{(m)(l)}\} \leq \rho_n^2 M^2 \{2(n+2)\}^{-\alpha}.$$

*Proof.* Equation (6) follows directly from the law of iterated expectation, with the first calculation following from conditioning on  $\xi$ :

$$\mathbb{E} A_{(i)(j)} = \mathbb{E}_\xi [\mathbb{E}_{A|\xi} \{A_{(i)(j)} | \xi\}] = \mathbb{E}_\xi \{\rho_n f(\xi_{(i)}, \xi_{(j)})\}, \quad (8)$$

and the second calculation following by approximation of the latter expectation, as we now show. As  $|\cdot|$  is convex, Jensen's inequality permits us to deduce that

$$|\mathbb{E}_\xi \rho_n f(\xi_{(i)}, \xi_{(j)}) - \rho_n f(i_n, j_n)| \leq \rho_n \mathbb{E}_\xi \{|f(\xi_{(i)}, \xi_{(j)}) - f(i_n, j_n)|\}. \quad (9)$$

We note that from Lemma 3, we have

$$\mathbb{E}_\xi |f(\xi_{(i)}, \xi_{(j)}) - f(i_n, j_n)| \leq M \{2(n+2)\}^{-\alpha/2}, \quad (10)$$

and so we can deduce (6) by combining (8)–(10).

Equation (7) is derived from the law of total variance by

$$\begin{aligned}\text{Var } A_{(i)(j)} &= \mathbb{E}_\xi [\text{Var}_{A|\xi} \{A_{(i)(j)}\}] + \text{Var}_\xi [\mathbb{E}_{A|\xi} \{A_{(i)(j)}\}] \\ &= \mathbb{E}_\xi \{ \rho_n f(\xi_{(i)}, \xi_{(j)}) (1 - \rho_n f(\xi_{(i)}, \xi_{(j)})) \} \\ &\quad + \mathbb{E}_\xi \{ \rho_n^2 f^2(\xi_{(i)}, \xi_{(j)}) \} - \mathbb{E}_\xi^2 \{ \rho_n f(\xi_{(i)}, \xi_{(j)}) \}, \quad 1 \leq i < j \leq n.\end{aligned}\tag{11}$$

The second and third terms in (11) cancel, and thus we obtain that

$$\text{Var } A_{(i)(j)} = \rho_n \{ \mathbb{E}_\xi f(\xi_{(i)}, \xi_{(j)}) \} \{ 1 - \rho_n \mathbb{E}_\xi f(\xi_{(i)}, \xi_{(j)}) \}.$$

We now need to calculate expectations with respect to the latent vector  $\xi$ . Owing to (10), we can upper bound  $\mathbb{E}_\xi f(\xi_{(i)}, \xi_{(j)})$  by the quantity  $\rho_n f(i_n, j_n) + \rho_n M \{2(n+2)\}^{-\alpha/2}$ , and likewise the negative term  $-\mathbb{E}_\xi f(\xi_{(i)}, \xi_{(j)})$  by the quantity  $-\rho_n f(i_n, j_n) + \rho_n M \{2(n+2)\}^{-\alpha/2}$ . Similarly,  $1 - \rho_n \mathbb{E}_\xi f(\xi_{(i)}, \xi_{(j)})$  and its negative can be lower bounded. Thus we may deduce the two inequalities

$$\begin{aligned}\text{Var } A_{(i)(j)} &\leq \rho_n \left[ f(i_n, j_n) + M \{2(n+2)\}^{-\alpha/2} \right] \\ &\quad \cdot \left[ 1 - \rho_n f(i_n, j_n) + \rho_n M \{2(n+2)\}^{-\alpha/2} \right], \\ \text{Var } A_{(i)(j)} &\geq \rho_n \left[ f(i_n, j_n) - M \{2(n+2)\}^{-\alpha/2} \right] \\ &\quad \cdot \left[ 1 - \rho_n f(i_n, j_n) - \rho_n M \{2(n+2)\}^{-\alpha/2} \right].\end{aligned}$$

Combining these two relationships, we obtain (7).

From the law of total covariance, we have that since  $i < j$  and  $m < l$ , when at least either  $i \neq m$  or  $j \neq l$ , the conditional independence of the Bernoulli trials comprising  $A$  yields

$$\begin{aligned}\text{Cov} \{A_{(i)(j)}, A_{(m)(l)}\} &= \mathbb{E}_\xi [\text{Cov}_{A|\xi} \{A_{(i)(j)}, A_{(m)(l)}\}] \\ &\quad + \text{Cov}_\xi [\mathbb{E}_{A|\xi} \{A_{(i)(j)}\}, \mathbb{E}_{A|\xi} \{A_{(m)(l)}\}] \\ &= \rho_n^2 \text{Cov}_\xi \{f(\xi_{(i)}, \xi_{(j)}), f(\xi_{(m)}, \xi_{(l)})\}.\end{aligned}\tag{12}$$

We now simplify this expression further, working directly with the form in (12). We define  $j_n = j/(n+1)$ , as well as  $m_n = m/(n+1)$  and  $l_n = l/(n+1)$ . We then use the shift-invariance of the covariance operator to write

$$\begin{aligned}&|\text{Cov}_\xi \{f(\xi_{(i)}, \xi_{(j)}), f(\xi_{(m)}, \xi_{(l)})\}| \\ &\leq |\mathbb{E}_\xi [\{f(\xi_{(i)}, \xi_{(j)}) - f(i_n, j_n)\} \{f(\xi_{(m)}, \xi_{(l)}) - f(m_n, l_n)\}]|,\end{aligned}$$

where we have a bound, rather than equality, because we do *not* claim that  $\mathbb{E}\{f(\xi_{(i)}, \xi_{(j)})\} = f(i_n, j_n)$ . We may use Jensen's inequality to deduce that

$$\begin{aligned}&|\mathbb{E}_\xi \{f(\xi_{(i)}, \xi_{(j)}) - f(i_n, j_n)\} \{f(\xi_{(m)}, \xi_{(l)}) - f(m_n, l_n)\}| \\ &\leq \mathbb{E}_\xi |\{f(\xi_{(i)}, \xi_{(j)}) - f(i_n, j_n)\} \{f(\xi_{(m)}, \xi_{(l)}) - f(m_n, l_n)\}|.\end{aligned}$$

Now, because  $f \in \text{Hölder}^\alpha(M)$  by hypothesis, there exists  $M < \infty$  such that

$$|f(x, y) - f(x', y')| \leq M|(x, y) - (x', y')|^\alpha,$$

and so we obtain that

$$\begin{aligned} \mathbb{E}_\xi |f(\xi_{(i)}, \xi_{(j)}) - f(i_n, j_n)| & |f(\xi_{(m)}, \xi_{(l)}) - f(m_n, l_n)| \\ & \leq M^2 \mathbb{E}_\xi |(\xi_{(i)}, \xi_{(j)}) - (i_n, j_n)|^\alpha |(\xi_{(m)}, \xi_{(l)}) - (m_n, l_n)|^\alpha. \end{aligned}$$

From the Cauchy–Schwarz inequality, it therefore follows that

$$\begin{aligned} \mathbb{E}_\xi |(\xi_{(i)}, \xi_{(j)}) - (i_n, j_n)|^\alpha |(\xi_{(m)}, \xi_{(l)}) - (m_n, l_n)|^\alpha \\ \leq \sqrt{\mathbb{E}_\xi |(\xi_{(i)}, \xi_{(j)}) - (i_n, j_n)|^{2\alpha}} \sqrt{\mathbb{E}_\xi |(\xi_{(m)}, \xi_{(l)}) - (m_n, l_n)|^{2\alpha}}. \end{aligned}$$

We then calculate

$$\mathbb{E}_\xi |(\xi_{(m)}, \xi_{(l)}) - (m_n, l_n)|^{2\alpha} = \mathbb{E}_\xi \left\{ (\xi_{(m)} - m_n)^2 + (\xi_{(l)} - l_n)^2 \right\}^\alpha.$$

Applying Jensen’s inequality, we find that for  $\alpha \leq 1$ ,

$$\mathbb{E}_\xi \left\{ (\xi_{(m)} - m_n)^2 + (\xi_{(l)} - l_n)^2 \right\}^\alpha \leq [\text{Var}\{\xi_{(l)}\} + \text{Var}\{\xi_{(j)}\}]^\alpha \leq \{2(n+2)\}^{-2\alpha}.$$

Thus we may deduce that

$$|\text{Cov}_\xi \{f(\xi_{(i)}, \xi_{(j)}), f(\xi_{(m)}, \xi_{(l)})\}| \leq M^2 \left[ \{2(n+2)\}^{-\alpha} \{2(n+2)\}^{-\alpha} \right]^{1/2}.$$

Combining this expression with (12) then yields the stated result.  $\square$

**Lemma 3.** *Let  $f \in \text{Hölder}^\alpha(M)$ , and let  $\{\xi_{(i)}\}_{i=1}^n$  be an ordered sample of independent  $\text{Uniform}(0, 1)$  random variables. Then for  $1 \leq i, j \leq n$  we have*

$$\mathbb{E}_\xi |f(\xi_{(i)}, \xi_{(j)}) - f(i_n, j_n)| \leq M \{2(n+2)\}^{-\alpha/2}.$$

*Proof.* We note that as  $f \in \text{Hölder}^\alpha(M)$ ,

$$|f(\xi_{(i)}, \xi_{(j)}) - f(i_n, j_n)| \leq M |(\xi_{(i)}, \xi_{(j)}) - (i_n, j_n)|^\alpha, \quad 1 \leq i, j \leq n.$$

Since  $\text{Var} \xi_{(i)} = i_n(1 - i_n)/(n+2) \leq (1/4)/(n+2)$ , by Jensen’s inequality we have for any  $0 < \alpha \leq 1$  that

$$\mathbb{E}_\xi \left\{ (\xi_{(i)} - i_n)^2 + (\xi_{(j)} - j_n)^2 \right\}^{\alpha/2} \leq (\text{Var} \xi_{(i)} + \text{Var} \xi_{(j)})^{\alpha/2} \leq \{2(n+2)\}^{-\alpha/2}.$$

This completes the proof.  $\square$

Lemma 3 has been adapted from Wolfe and Olhede [16].

**Lemma 4** (Linear quadrature bounds). *Let  $f \in \text{Hölder}^\alpha(M)$  be a symmetric function on  $(0, 1)^2$ , and define  $i_n = i/(n+1)$ ,  $j_n = j/(n+1)$ . Then with*

$$\tilde{f}_{ab} = \frac{1}{h_{ab}^2} \sum_{(i,j) \in R_{ab}} f(i_n, j_n), \quad 1 \leq a \leq b \leq k,$$

we have that

$$\left| \tilde{f}_{ab} - \bar{f}_{ab} \right| \leq M 2^{\alpha/2} n^{-\alpha} \{1 + 2^\alpha \mathbb{I}(a = b)\}.$$

*Proof.* We start from the definition of

$$\bar{f}_{ab} = \frac{1}{h_{ab}^2} \sum_{(i,j) \in R_{ab}} f(i_n, j_n).$$

Thus we may by simple expansion determine

$$\begin{aligned} \tilde{f}_{ab} &= \frac{n^2}{h_{ab}^2} \sum_{(i,j) \in R_{ab}} \int_{\frac{j-1}{n}}^{\frac{j}{n}} \int_{\frac{i-1}{n}}^{\frac{i}{n}} [f(x, y) + f(i_n, j_n) - f(x, y)] dx dy \\ &= \frac{n^2}{h_{ab}^2} \sum_{(i,j) \in R_{ab}} \left[ \int_{\frac{j-1}{n}}^{\frac{j}{n}} \int_{\frac{i-1}{n}}^{\frac{i}{n}} f(x, y) dx dy + \int_{\frac{j-1}{n}}^{\frac{j}{n}} \int_{\frac{i-1}{n}}^{\frac{i}{n}} \{f(i_n, j_n) - f(x, y)\} dx dy \right] \end{aligned}$$

We now use the fact that  $f(x, y) \in \text{Hölder}^\alpha(M)$ . Thus we may write

$$\begin{aligned} &\left| \frac{n^2}{h_{ab}^2} \sum_{(i,j) \in R_{ab}} \int_{\frac{j-1}{n}}^{\frac{j}{n}} \int_{\frac{i-1}{n}}^{\frac{i}{n}} \{f(i_n, j_n) - f(x, y)\} dx dy \right| \\ &\leq \frac{n^2}{h_{ab}^2} \sum_{(i,j) \in R_{ab}} \int_{\frac{j-1}{n}}^{\frac{j}{n}} \int_{\frac{i-1}{n}}^{\frac{i}{n}} |f(i_n, j_n) - f(x, y)| dx dy \leq \frac{M 2^{\alpha/2}}{n^\alpha}, \end{aligned} \quad (13)$$

with the last inequality following from the fact that  $f$  is a  $\alpha$ -Hölder function on the domain of integration. Furthermore, we note directly if  $a < b$  then, with  $\omega_{ab}$  as defined in (1),

$$\frac{n^2}{h_{ab}^2} \sum_{(i,j) \in R_{ab}} \int_{\frac{j-1}{n}}^{\frac{j}{n}} \int_{\frac{i-1}{n}}^{\frac{i}{n}} f(x, y) dx dy = \frac{n^2}{h_{ab}^2} \iint_{\omega_{ab}} f(x, y) dx dy. \quad (14)$$

If on the other hand  $a = b$  then

$$\begin{aligned} &\frac{n^2}{\binom{hb}{2}} \sum_{(i,j) \in R_{bb}} \int_{\frac{j-1}{n}}^{\frac{j}{n}} \int_{\frac{i-1}{n}}^{\frac{i}{n}} f(x, y) dx dy \\ &= \frac{n^2}{\binom{hb}{2}} \sum_{j=(b-1)h+1}^{hb \mathbb{I}(b < k) + n \mathbb{I}(b=k)} \sum_{i=(b-1)h+1}^{j-1} \int_{\frac{j-1}{n}}^{\frac{j}{n}} \int_{\frac{i-1}{n}}^{\frac{i}{n}} f(x, y) dx dy. \end{aligned} \quad (15)$$

This equation acknowledges that group  $a$  has size  $h_a$ , which is equal to  $h$  for  $a = 1, \dots, k-1$ , and  $h_k = h + r$  for  $a = k$ . We shall start by simplifying this expression. We note that the latter becomes:

$$\begin{aligned}
& \frac{n^2}{\binom{hb}{2}} \sum_{j=(b-1)h+1}^{hb \mathbb{I}(b < k) + n \mathbb{I}(b = k)} \int_{\frac{j-1}{n}}^{\frac{j}{n}} \int_{\frac{(b-1)h}{n}}^{\frac{j-1}{n}} f(x, y) dx dy \\
&= \bar{f}_{bb} + \sum_{j=(b-1)h+1}^{hb \mathbb{I}(b < k) + n \mathbb{I}(b = k)} \int_{\frac{j-1}{n}}^{\frac{j}{n}} \left\{ \left[ \frac{n^2}{\binom{hb}{2}} - \frac{2n^2}{h_b^2} \right] \int_{\frac{(b-1)h}{n}}^y - \frac{n^2}{\binom{hb}{2}} \int_{\frac{j-1}{n}}^y \right\} f(x, y) dx dy \\
&= \bar{f}_{bb} + \frac{2n^2}{h_b} \sum_{j=(b-1)h+1}^{hb \mathbb{I}(b < k) + n \mathbb{I}(b = k)} \int_{\frac{j-1}{n}}^{\frac{j}{n}} \left\{ \left[ \frac{1}{h_b - 1} - \frac{1}{h_b} \right] \int_{\frac{(b-1)h}{n}}^y - \frac{1}{h_b - 1} \int_{\frac{j-1}{n}}^y \right\} \\
&\quad \cdot f(x, y) dx dy \\
&= \bar{f}_{bb} + \frac{2n^2}{h_b} \sum_{j=(b-1)h+1}^{hb \mathbb{I}(b < k) + n \mathbb{I}(b = k)} \int_{\frac{j-1}{n}}^{\frac{j}{n}} \left\{ \frac{1}{h_b(h_b - 1)} \int_{\frac{(b-1)h}{n}}^y - \frac{1}{h_b - 1} \int_{\frac{j-1}{n}}^y \right\} \\
&\quad \cdot f(x, y) dx dy \\
&= \bar{f}_{bb} + \frac{1}{(h_b - 1)} \sum_{j=(b-1)h+1}^{hb \mathbb{I}(b < k) + n \mathbb{I}(b = k)} \int_{\frac{j-1}{n}}^{\frac{j}{n}} \left\{ \frac{2n^2}{h_b^2} \int_{\frac{(b-1)h}{n}}^y - \frac{2n^2}{h_b} \int_{\frac{j-1}{n}}^y \right\} f(x, y) dx dy \\
&= \bar{f}_{bb} + \frac{1}{(h_b - 1)} \left\{ \bar{f}_{bb} - \frac{2n^2}{h_b} \sum_{j=(b-1)h+1}^{hb \mathbb{I}(b < k) + n \mathbb{I}(b = k)} \int_{\frac{j-1}{n}}^{\frac{j}{n}} \int_{\frac{j-1}{n}}^y f(x, y) dx dy \right\} \\
&= \bar{f}_{bb} + \frac{1}{(h_b - 1)} \left\{ \frac{2n^2}{h_b} \sum_{j=(b-1)h+1}^{hb \mathbb{I}(b < k) + n \mathbb{I}(b = k)} \int_{\frac{j-1}{n}}^{\frac{j}{n}} \int_{\frac{j-1}{n}}^y (\bar{f}_{bb} - f(x, y)) dx dy \right\}.
\end{aligned} \tag{16}$$

We note that

$$\begin{aligned}
& \left| \frac{2n^2}{h_b} \sum_{j=(b-1)h+1}^{hb \mathbb{I}(b < k) + n \mathbb{I}(b = k)} \int_{\frac{j-1}{n}}^{\frac{j}{n}} \int_{\frac{j-1}{n}}^y (\bar{f}_{bb} - f(x, y)) dx dy \right| \\
&\leq \frac{2n^2}{h_b} \sum_{j=(b-1)h+1}^{hb \mathbb{I}(b < k) + n \mathbb{I}(b = k)} \int_{\frac{j-1}{n}}^{\frac{j}{n}} \int_{\frac{j-1}{n}}^y |\bar{f}_{bb} - f(x, y)| dx dy \leq M \left( \sqrt{2} h_b / n \right)^\alpha.
\end{aligned} \tag{17}$$

Thus, combining (17) with (13), (15), and (16), we have

$$\left| \bar{f}_{bb} - \tilde{f}_{bb} \right| \leq \frac{M 2^{\alpha/2}}{n^\alpha} + M \left( \sqrt{2} h_b / n \right)^\alpha \frac{1}{h_b - 1}.$$



From the off-diagonal entries  $a < b$  we may conclude from (13) and (14) that

$$\left| \bar{f}_{ab} - \tilde{f}_{ab} \right| \leq \frac{M2^{\alpha/2}}{n^\alpha}.$$

Thus it follows that

$$\left| \bar{f}_{ab} - \tilde{f}_{ab} \right| \leq \frac{M2^{\alpha/2}}{n^\alpha} + \begin{cases} 0 & a \neq b, \\ M(\sqrt{2}h_b/n)^\alpha \frac{1}{h_b-1} & a = b. \end{cases}$$

Since  $\frac{h_b^\alpha}{(h_b-1)} \leq 2^\alpha$  if  $h_b \geq 2$ , the expression follows. This concludes the proof.  $\square$

Lemma 4 has been adapted from Wolfe and Olhede [16].

**Lemma 5** (Square quadrature bounds). *Let  $f \in \text{H\"older}^\alpha(M)$  be a symmetric function on  $(0, 1)^2$ , and define  $i_n = i/(n+1)$ ,  $j_n = j/(n+1)$ . Then with*

$$\widetilde{f}_{ab}^2 = \frac{1}{h_{ab}^2} \sum_{(i,j) \in R_{ab}} f^2(i_n, j_n), \quad 1 \leq a \leq b \leq k,$$

we have that

$$\left| \widetilde{f}_{ab}^2 - \bar{f}_{ab}^2 \right| \leq \frac{2\|f\|_\infty M2^{\alpha/2}}{n^\alpha} \{1 + 2^\alpha \mathbb{I}(a = b)\}.$$

*Proof.* We start from

$$\begin{aligned} \widetilde{f}_{ab}^2 &= \frac{n^2}{h_{ab}^2} \sum_{(i,j) \in R_{ab}} \int_{\frac{j-1}{n}}^{\frac{j}{n}} \int_{\frac{i-1}{n}}^{\frac{i}{n}} [f^2(x, y) + f^2(i_n, j_n) - f^2(x, y)] dx dy \\ &= \frac{n^2}{h_{ab}^2} \sum_{(i,j) \in R_{ab}} \left\{ \int_{\frac{j-1}{n}}^{\frac{j}{n}} \int_{\frac{i-1}{n}}^{\frac{i}{n}} f^2(x, y) + \int_{\frac{j-1}{n}}^{\frac{j}{n}} \int_{\frac{i-1}{n}}^{\frac{i}{n}} f^2(i_n, j_n) - f^2(x, y) \right\} dx dy. \end{aligned}$$

We now use that  $f(x, y) \in \text{H\"older}^\alpha(M)$ . We write

$$\begin{aligned} &\left| \frac{n^2}{h_{ab}^2} \sum_{(i,j) \in R_{ab}} \int_{\frac{j-1}{n}}^{\frac{j}{n}} \int_{\frac{i-1}{n}}^{\frac{i}{n}} \{f^2(i_n, j_n) - f^2(x, y)\} dx dy \right| \\ &\leq \frac{n^2}{h_{ab}^2} \sum_{(i,j) \in R_{ab}} \int_{\frac{j-1}{n}}^{\frac{j}{n}} \int_{\frac{i-1}{n}}^{\frac{i}{n}} |f^2(i_n, j_n) - f^2(x, y)| dx dy \\ &= \frac{n^2}{h_{ab}^2} \sum_{(i,j) \in R_{ab}} \int_{\frac{j-1}{n}}^{\frac{j}{n}} \int_{\frac{i-1}{n}}^{\frac{i}{n}} |f(i_n, j_n) + f(x, y)| |f(i_n, j_n) - f(x, y)| dx dy \\ &\leq \frac{2\|f\|_\infty n^2}{h_{ab}^2} \sum_{(i,j) \in R_{ab}} \int_{\frac{j-1}{n}}^{\frac{j}{n}} \int_{\frac{i-1}{n}}^{\frac{i}{n}} |f(i_n, j_n) - f(x, y)| dx dy \\ &\leq \frac{2\|f\|_\infty M2^{\alpha/2}}{n^\alpha}, \end{aligned} \tag{18}$$

with the final inequality following from (13) of the previous lemma. We note directly if  $a < b$  then

$$\frac{n^2}{h_{ab}^2} \sum_{(i,j) \in R_{ab}} \int_{\frac{j-1}{n}}^{\frac{j}{n}} \int_{\frac{i-1}{n}}^{\frac{i}{n}} f^2(x, y) dx dy = \frac{n^2}{h_{ab}^2} \iint_{\omega_{ab}} f^2(x, y) dx dy. \quad (19)$$

From the off-diagonal entries, for which  $a < b$ , we may conclude directly from (18) and (19) that

$$\left| \overline{f^2}_{ab} - \widetilde{f^2}_{ab} \right| \leq \frac{2\|f\|_\infty M 2^{\alpha/2}}{n^\alpha}.$$

If on the other hand  $a = b$  then

$$\begin{aligned} \frac{n^2}{\binom{h_b}{2}} \sum_{(i,j) \in R_{bb}} \int_{\frac{j-1}{n}}^{\frac{j}{n}} \int_{\frac{i-1}{n}}^{\frac{i}{n}} f^2(x, y) dx dy \\ = \frac{n^2}{\binom{h_b}{2}} \sum_{j=(b-1)h+1}^{hb \mathbb{I}(b < k) + n \mathbb{I}(b=k)} \sum_{i=(b-1)h+1}^{j-1} \int_{\frac{j-1}{n}}^{\frac{j}{n}} \int_{\frac{i-1}{n}}^{\frac{i}{n}} f^2(x, y) dx dy. \end{aligned}$$

We shall start by simplifying this expression. We note that the latter becomes:

$$\begin{aligned} \frac{n^2}{\binom{h_b}{2}} \sum_{j=(b-1)h+1}^{hb \mathbb{I}(b < k) + n \mathbb{I}(b=k)} \int_{\frac{j-1}{n}}^{\frac{j}{n}} \int_{\frac{(b-1)h}{n}}^{\frac{j-1}{n}} f^2(x, y) dx dy \\ = \overline{f^2}_{bb} + \frac{1}{(h_b - 1)} \frac{2n^2}{h_b} \sum_{j=(b-1)h+1}^{hb \mathbb{I}(b < k) + n \mathbb{I}(b=k)} \int_{\frac{j-1}{n}}^{\frac{j}{n}} \int_{\frac{j-1}{n}}^y \left( \overline{f^2}_{bb} - f^2(x, y) \right) dx dy. \end{aligned}$$

We may note directly that

$$\frac{(b-1)h}{n} \leq x < y \leq \frac{bh \mathbb{I}(b < k) + n \mathbb{I}(b = k)}{n} = \frac{bh}{n} \mathbb{I}(b < k) + \mathbb{I}(b = k),$$

and so it follows that

$$\begin{aligned} \left| \overline{f^2}_{bb} - f^2(x, y) \right| &\leq \left| \frac{\int_{\frac{bh}{n} \mathbb{I}(b < k) + \mathbb{I}(b=k)}^{\frac{bh}{n} \mathbb{I}(b < k) + \mathbb{I}(b=k)} \int_{\frac{(b-1)h}{n}}^{\frac{bh}{n} \mathbb{I}(b < k) + \mathbb{I}(b=k)} f^2(x', y') dx' dy'}{\left\{ \frac{h_b}{n} \right\}^2} - f^2(x, y) \right| \\ &\leq \frac{n^2}{h_b^2} \int_{\frac{(b-1)h}{n}}^{\frac{bh}{n} \mathbb{I}(b < k) + \mathbb{I}(b=k)} \int_{\frac{(b-1)h}{n}}^{\frac{bh}{n} \mathbb{I}(b < k) + \mathbb{I}(b=k)} |f^2(x', y') - f^2(x, y)| dx' dy' \\ &\leq \frac{2\|f\|_\infty n^2}{h_b^2} \int_{\frac{(b-1)h}{n}}^{\frac{bh}{n} \mathbb{I}(b < k) + \mathbb{I}(b=k)} \int_{\frac{(b-1)h}{n}}^{\frac{bh}{n} \mathbb{I}(b < k) + \mathbb{I}(b=k)} |f(x', y') - f(x, y)| dx' dy' \\ &\leq 2\|f\|_\infty M \left( \frac{\sqrt{2}h_b}{n} \right)^\alpha. \end{aligned}$$

Thus

$$\begin{aligned}
& \left| \frac{n^2}{\binom{h_b}{2}} \sum_{j=(b-1)h+1}^{hb\mathbb{I}(b<k)+n\mathbb{I}(b=k)} \int_{\frac{j-1}{n}}^{\frac{j}{n}} \int_{\frac{(b-1)h}{n}}^{\frac{j-1}{n}} f^2(x, y) dx dy - \overline{f^2}_{bb} \right| \\
& \leq \frac{1}{(h_b - 1)} \frac{2n^2}{h_b} \sum_{j=(b-1)h+1}^{hb\mathbb{I}(b<k)+n\mathbb{I}(b=k)} \int_{\frac{j-1}{n}}^{\frac{j}{n}} \int_{\frac{j-1}{n}}^y 2\|f\|_\infty M \left( \frac{\sqrt{2}h_b}{n} \right)^\alpha dx dy. \\
& = \frac{1}{(h_b - 1)} 2\|f\|_\infty M \left( \frac{\sqrt{2}h_b}{n} \right)^\alpha.
\end{aligned}$$

For the on-diagonal entries having  $a = b$ , it therefore follows that

$$\left| \overline{f^2}_{bb} - \widetilde{f^2}_{bb} \right| \leq \frac{2\|f\|_\infty M 2^{\alpha/2}}{n^\alpha} + \frac{1}{(h_b - 1)} 2\|f\|_\infty M \left( \frac{\sqrt{2}h_b}{n} \right)^\alpha.$$

Note that  $\frac{h_b^\alpha}{(h_b-1)} \leq 2^\alpha$  if  $h_b \geq 2$ , and so the expression follows.  $\square$
